# Supplementary material
Source: PubMed Central journal article supplement (PMC5774208)

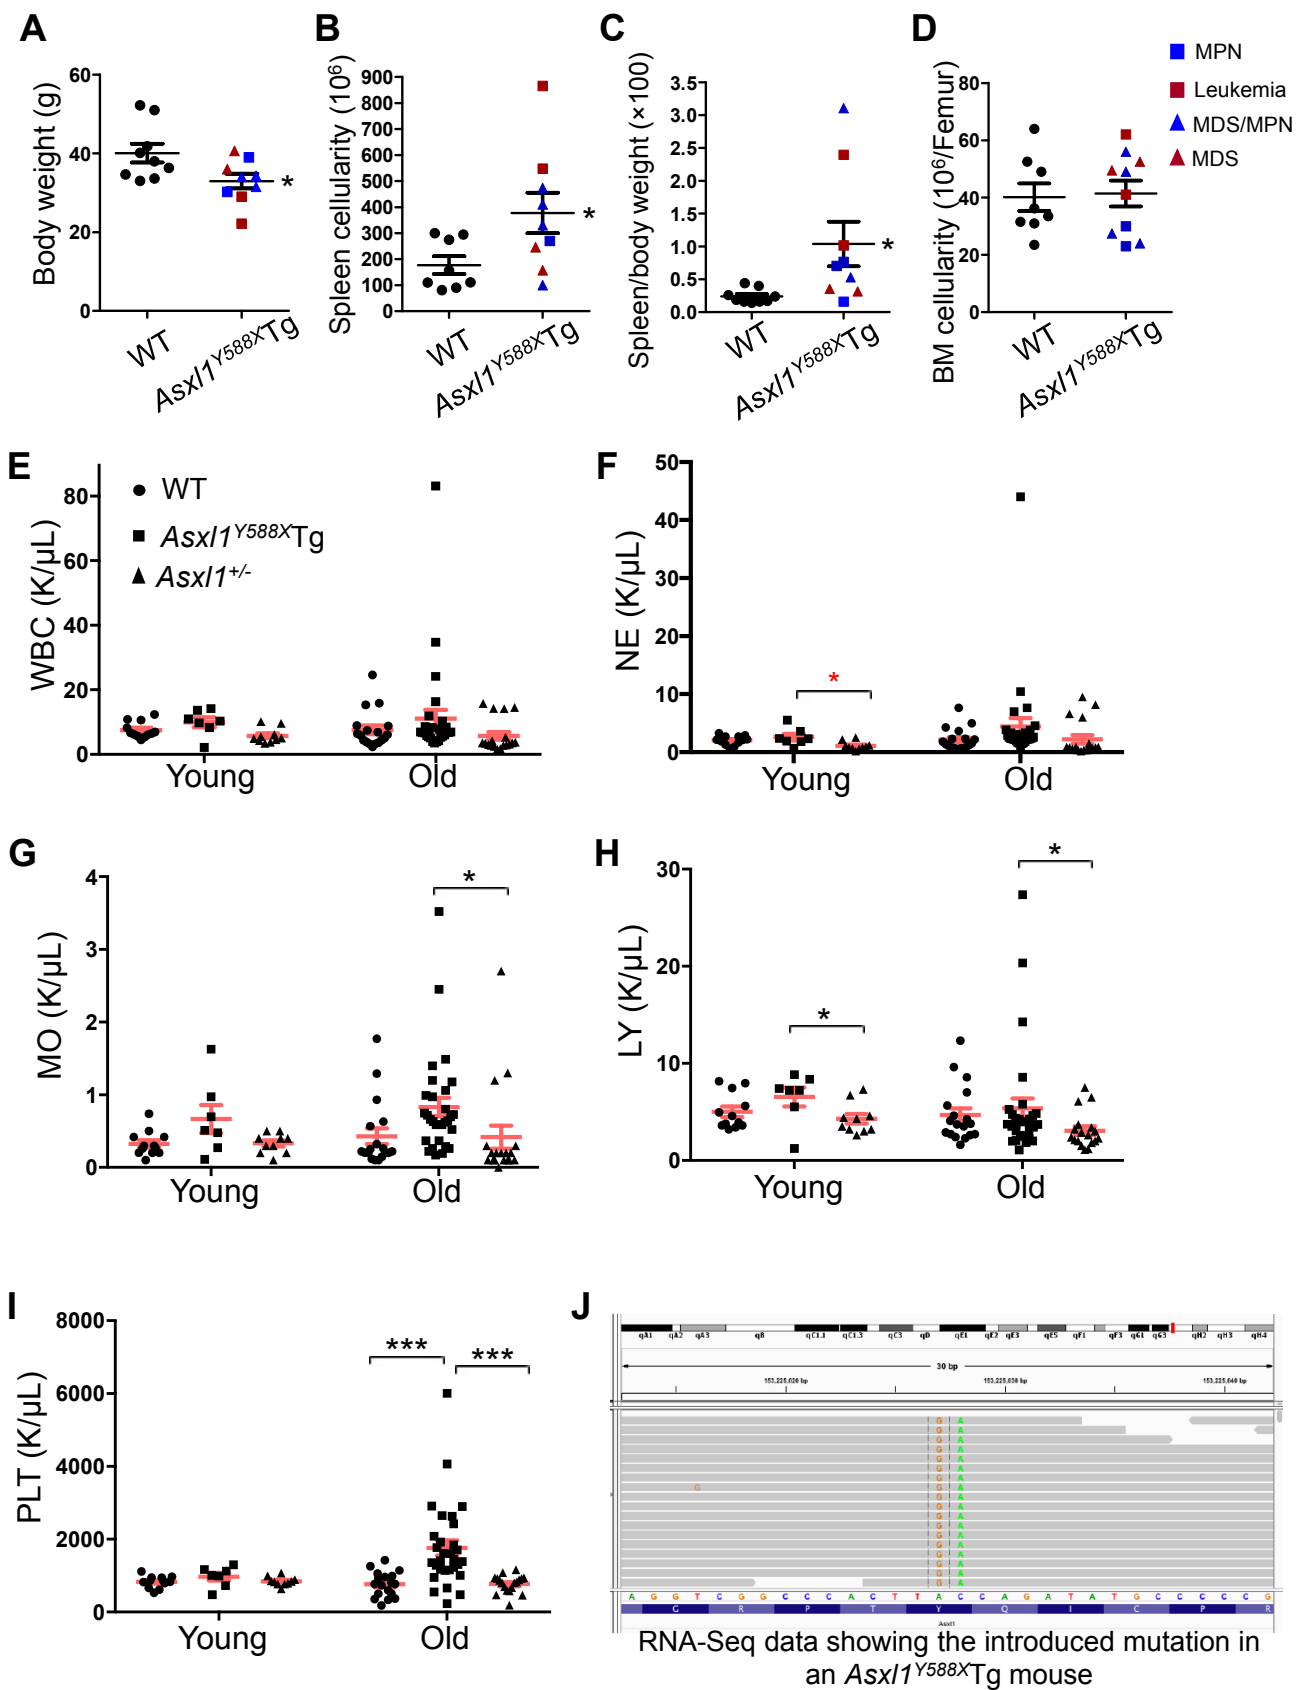

Yang et al. Supplemental Figure 1

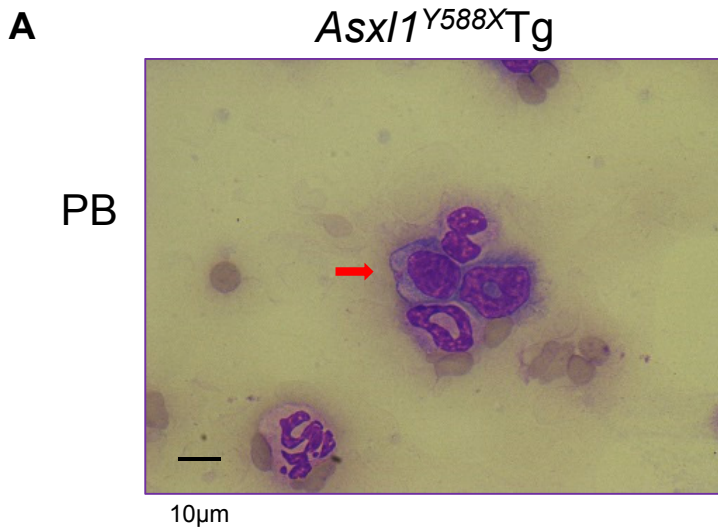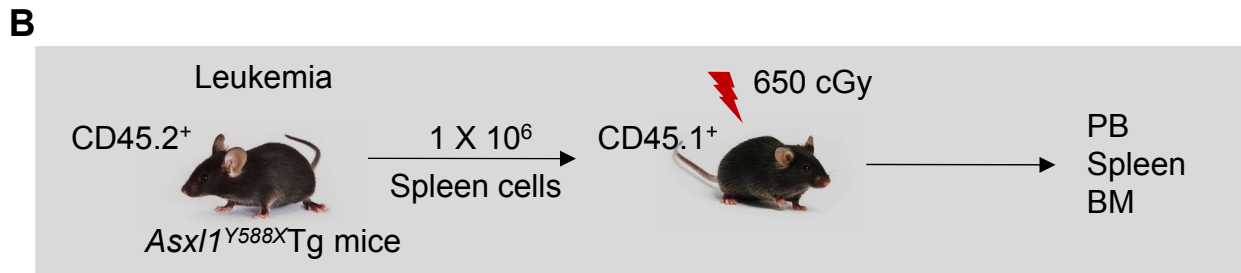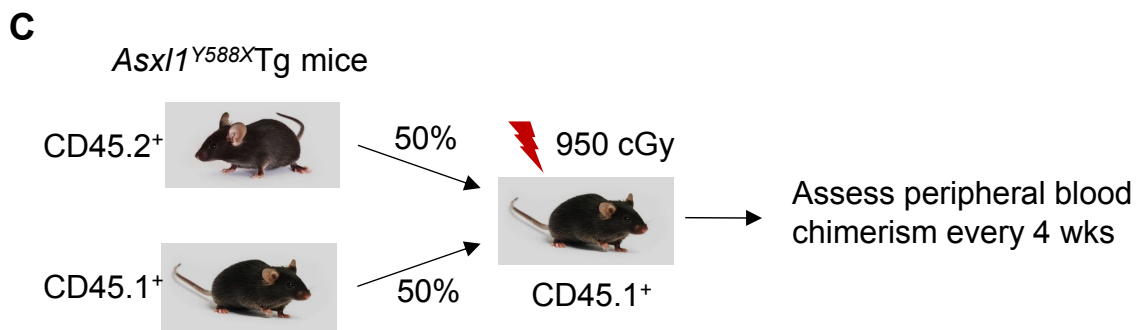

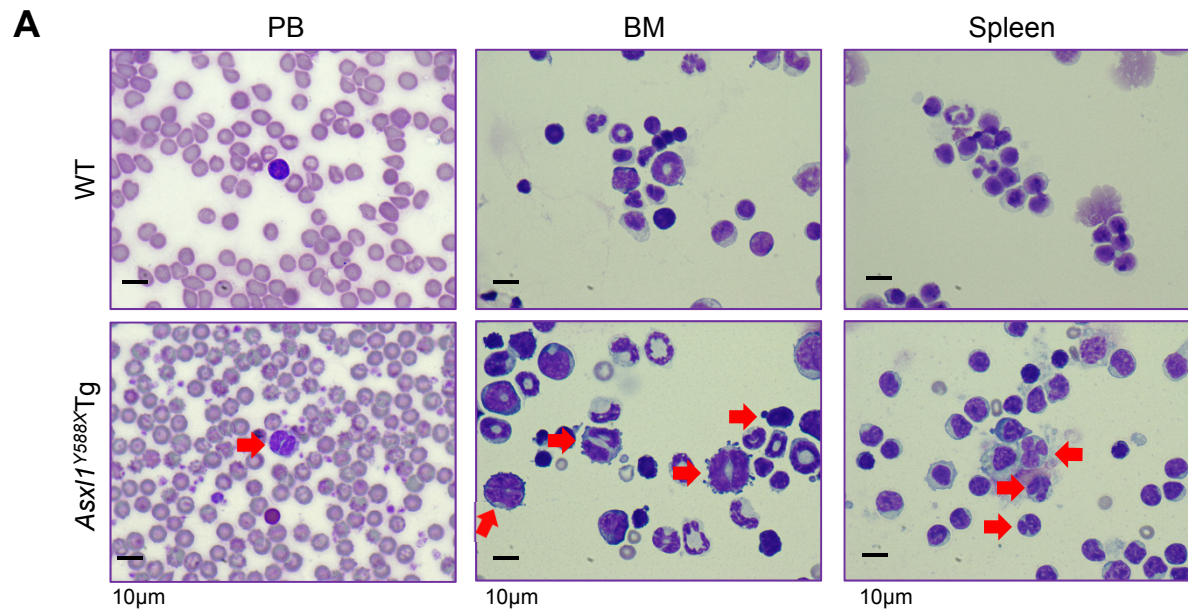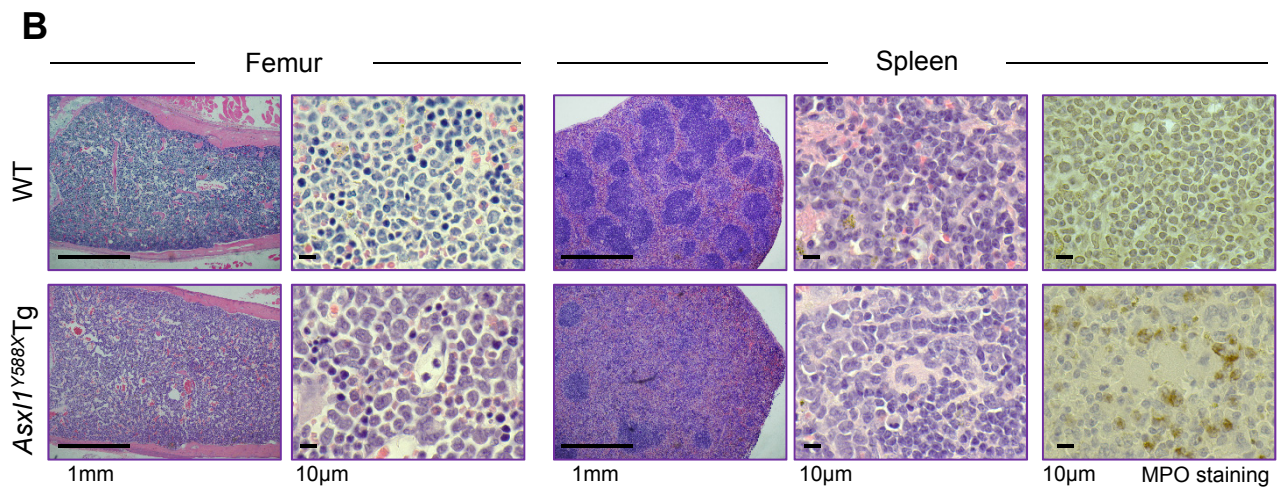

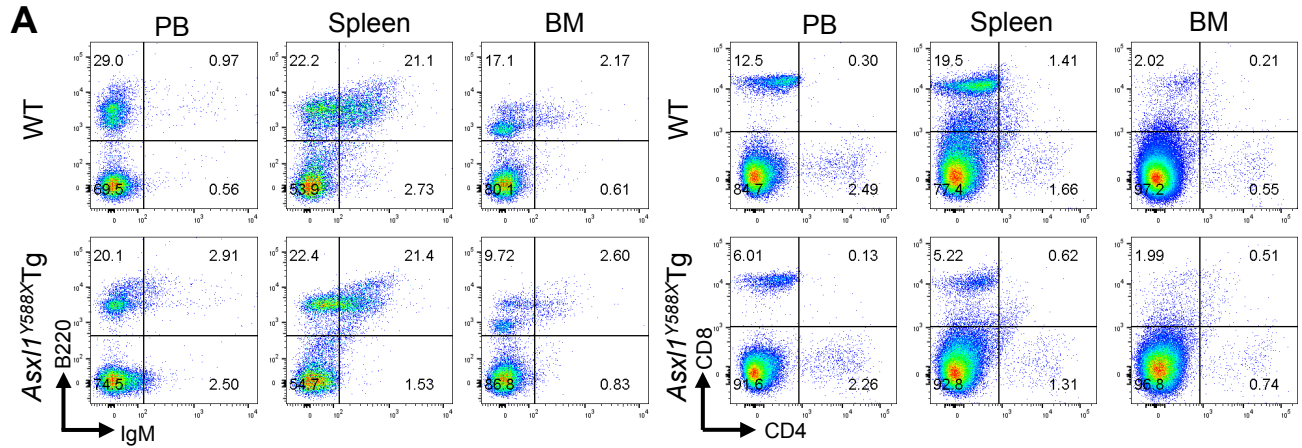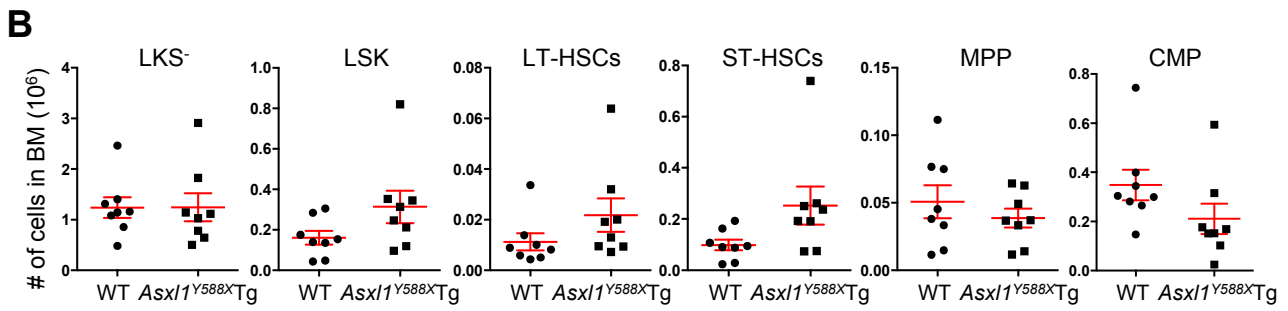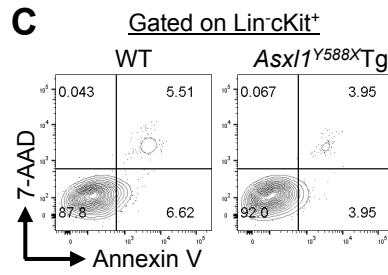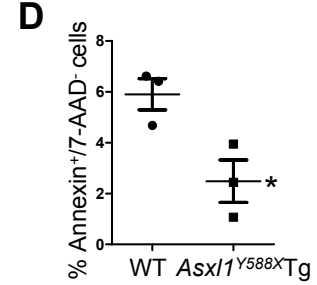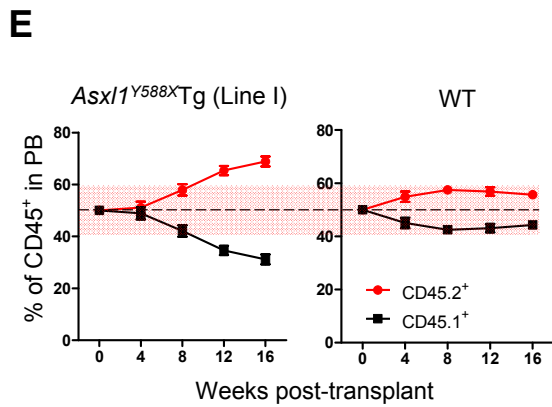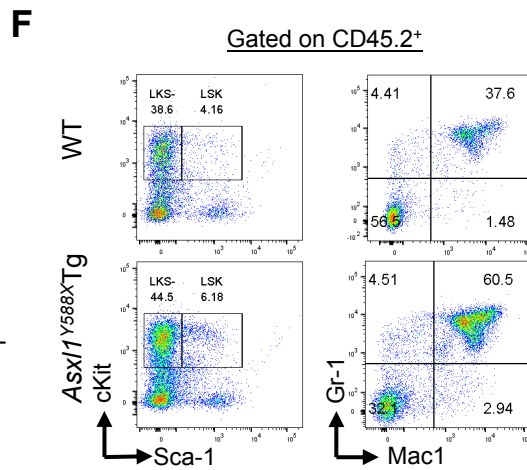

**A**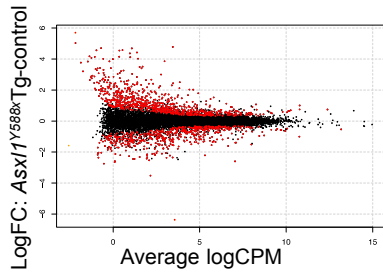**B**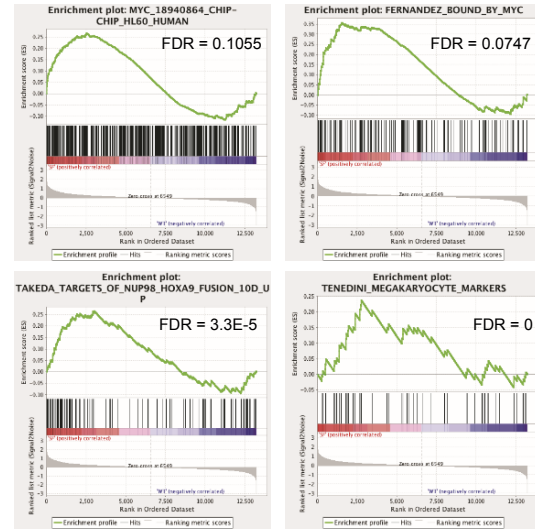**C**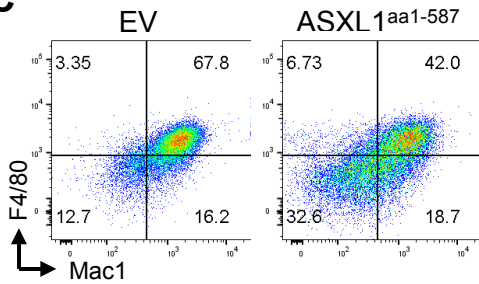**D**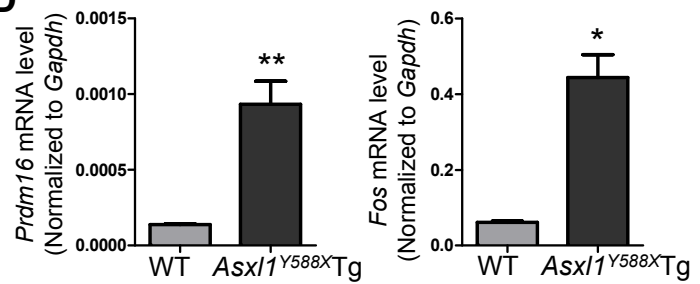**E**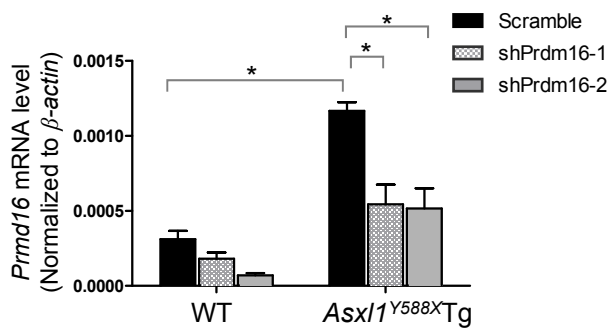**F**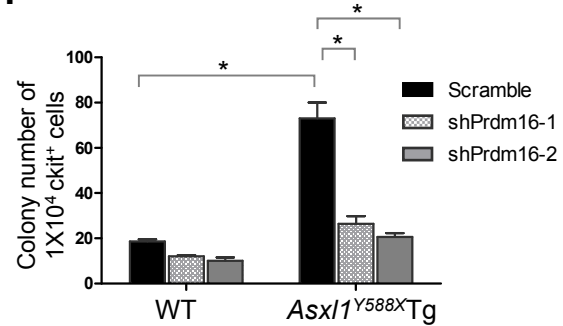**G**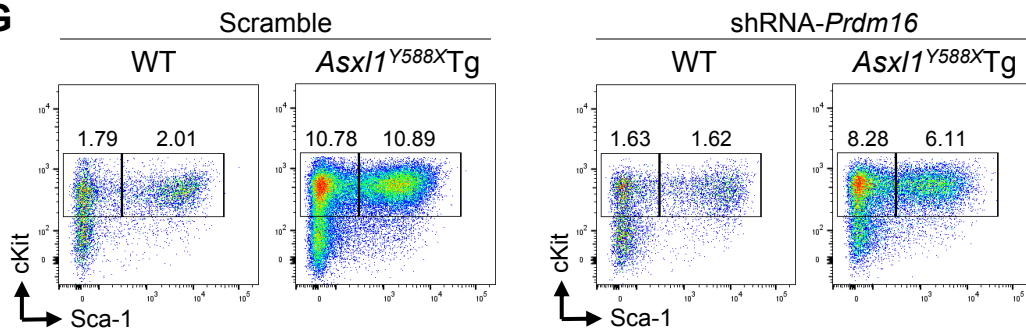



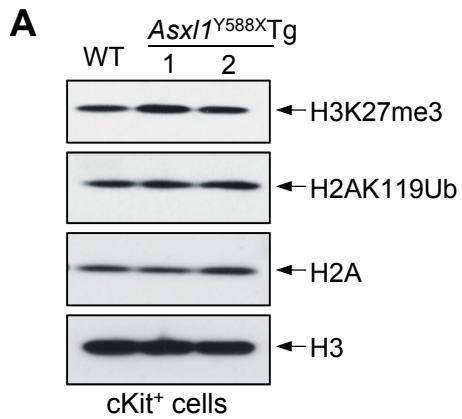

**B**

| Protein | ASXL1 <sup>FL</sup>               | ASXL1 <sup>aa1-587</sup>          |
|---------|-----------------------------------|-----------------------------------|
|         | No. of Peptides<br>Total (Unique) | No. of Peptides<br>Total (Unique) |
| ASXL1   | 270 (24)                          | 949 (36)                          |
| BRD4    | 0 (0)                             | 4 (4)                             |

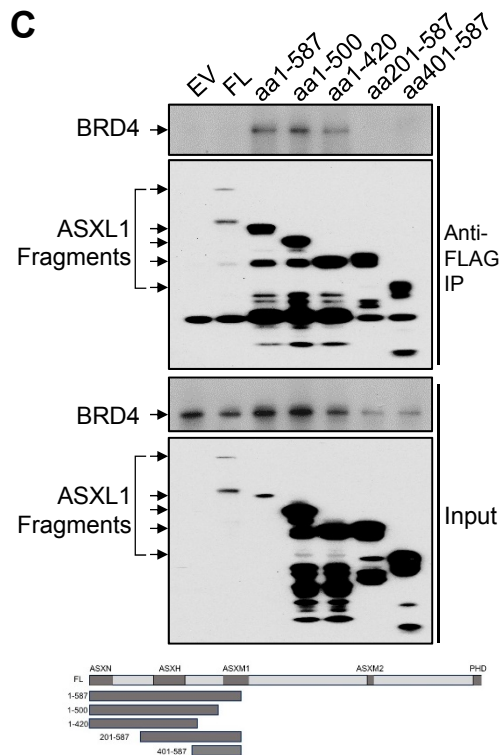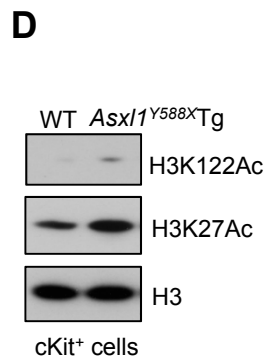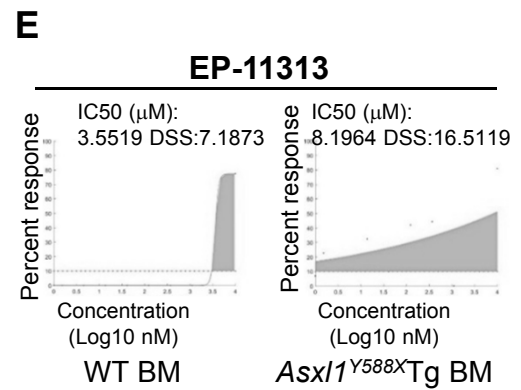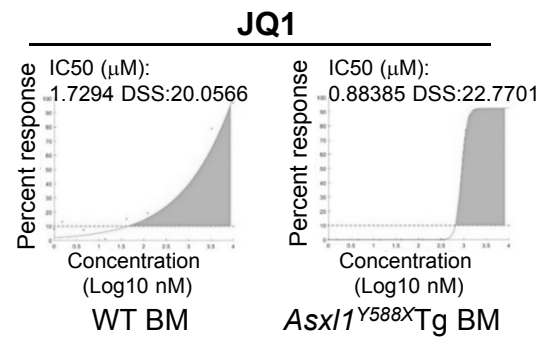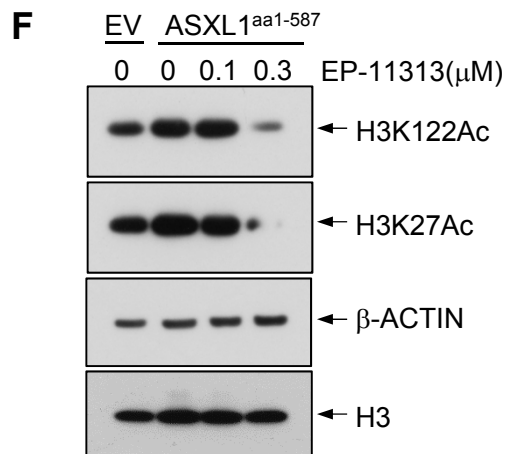

Supplement: blood789669-suppl2.pdf [file blood789669-suppl2.pdf]
